# Supplementary material for: Interactions Between Innate Immunity Genes and Early-Life Risk Factors in Allergic Rhinitis
Source: PubMed Central journal article supplement — Allergy Asthma Immunol Res. 2015 Mar 18;7(3):241–8. doi: 10.4168/aair.2015.7.3.241 (PMC4397364; doi:10.4168/aair.2015.7.3.241), 2015-03-18
Supplement: aair-7-241-s001.pdf [file aair-7-241-s001.pdf]

**Supplemental Table 1.** Influence of polymorphisms in innate immune system genes in the development of allergic rhinitis

|                          | CD14 (CT+CC to TT) |                     | TLR4 (CT+TT to CC) |                     |
|--------------------------|--------------------|---------------------|--------------------|---------------------|
|                          | Number             | aOR* (95% CI)       | Number             | aOR* (95% CI)       |
| Allergic rhinitis        | 252/1,008          | 1.258 (0.922-1.715) | 234/989            | 1.028 (0.748-1.414) |
| Atopic allergic rhinitis | 143/989            | 1.112 (0.763-1.621) | 134/971            | 0.939 (0.640-1.378) |

\*Adjusted for age, sex, parental income, parental history of allergic diseases, body mass index, exposure to tobacco smoke and region.  
aOR, adjusted odds ratio; CI, confidence interval.
